# Supplementary material for: Valence structures of the diastereomeric complexes meso- and rac-[Ru2(acac)4(μ-Q)]n (n = 2−, 1−, 0, 1+, 2+) with the multiple quinonoid bridging ligand Q = 1,2,4,5-tetraimino-3,6-diketocyclohexane
Source: Royal Society of Chemistry journal article supplement (doi:10.1039/b906900c), 2009-01-01

## Supplementary Information

**Valence structures of the diastereomeric complexes *meso*- and *rac*-  
[Ru<sub>2</sub>(acac)<sub>4</sub>(μ-Q)]<sup>n</sup> (n = 2-, -, 0, +, 2+) with the multiply quinonoid bridging  
ligand Q = 1,2,4,5-tetraimino-3,6-diketocyclohexane**

Doyel Kumbhakar,<sup>a</sup> Biprajit Sarkar,<sup>b</sup> Amit Das,<sup>a</sup> Atanu Kumar Das,<sup>b</sup> Shaikh M. Mobin,<sup>a</sup> Jan  
Fiedler,<sup>c</sup> Wolfgang Kaim<sup>\*b</sup> and Goutam Kumar Lahiri<sup>\*a</sup>

**Table S1.** Crystal data for 1.2H<sub>2</sub>O

| 1·2H <sub>2</sub> O                              |                                                                                |
|--------------------------------------------------|--------------------------------------------------------------------------------|
| molecular formula                                | C <sub>26</sub> H <sub>36</sub> N <sub>4</sub> O <sub>12</sub> Ru <sub>2</sub> |
| fw                                               | 798.73                                                                         |
| crystal system                                   | triclinic                                                                      |
| space group                                      | <i>P</i> -1                                                                    |
| <i>a</i> (Å)                                     | 7.762(3)                                                                       |
| <i>b</i> (Å)                                     | 14.41(2)                                                                       |
| <i>c</i> (Å)                                     | 14.4522(13)                                                                    |
| $\alpha$ (deg)                                   | 77.566(3)                                                                      |
| $\beta$ (deg)                                    | 85.492(8)                                                                      |
| $\gamma$ (deg)                                   | 89.57(3)                                                                       |
| <i>V</i> (Å <sup>3</sup> )                       | 1574(2)                                                                        |
| <i>Z</i>                                         | 2                                                                              |
| $\mu$ (mm <sup>-1</sup> )                        | 1.025                                                                          |
| <i>T</i> (K)                                     | 150(2)                                                                         |
| <i>D</i> <sub>calcd</sub> (g cm <sup>-3</sup> )  | 1.677                                                                          |
| F (000)                                          | 800                                                                            |
| $\theta$ range(deg)                              | 3.02 to 30.00                                                                  |
| Data/Restraints/Parameters                       | 8970 / 353 / 405                                                               |
| R1, wR2 [ <i>I</i> > 2 $\sigma$ ( <i>I</i> )]    | 0.2411, 0.4924                                                                 |
| R1, wR2(all data)                                | 0.3239, 0.5299                                                                 |
| GOF                                              | 1.484                                                                          |
| largest diff. peak/hole,<br>(e Å <sup>-3</sup> ) | 14.325, -2.656                                                                 |

**Table S2.** Selected bond distances (Å) and angles (°) for 1.2H<sub>2</sub>O

| Bond Lengths |           | Bond Angles     |         |
|--------------|-----------|-----------------|---------|
| Ru(1)-N(1)   | 1.918(15) | N(1)-Ru(1)-N(2) | 82.7(7) |
| Ru(1)-N(2)   | 1.876(17) | N(3)-Ru(2)-N(4) | 78.5(7) |
| Ru(2)-N(3)   | 1.973(15) |                 |         |
| Ru(2)-N(4)   | 1.876(15) |                 |         |
| N(1)-C(11)   | 1.31(3)   |                 |         |
| N(2)-C(12)   | 1.30(2)   |                 |         |
| C(12)-C(13)  | 1.44(3)   |                 |         |
| C(13)-O(5)   | 1.25(2)   |                 |         |
| N(3)-C(25)   | 1.28(2)   |                 |         |
| N(4)-C(24)   | 1.29(3)   |                 |         |
| C(24)-C(25)  | 1.41(3)   |                 |         |
| C(26)-O(10)  | 1.22(2)   |                 |         |

**Fig. S1.** Mass spectra of (a) **1** and (b) **2** in CH<sub>2</sub>Cl<sub>2</sub>. Ionization probe: ESI. Analyser: Quadrupole and time of flight. Detector: Micro channel plate detector (MCP)

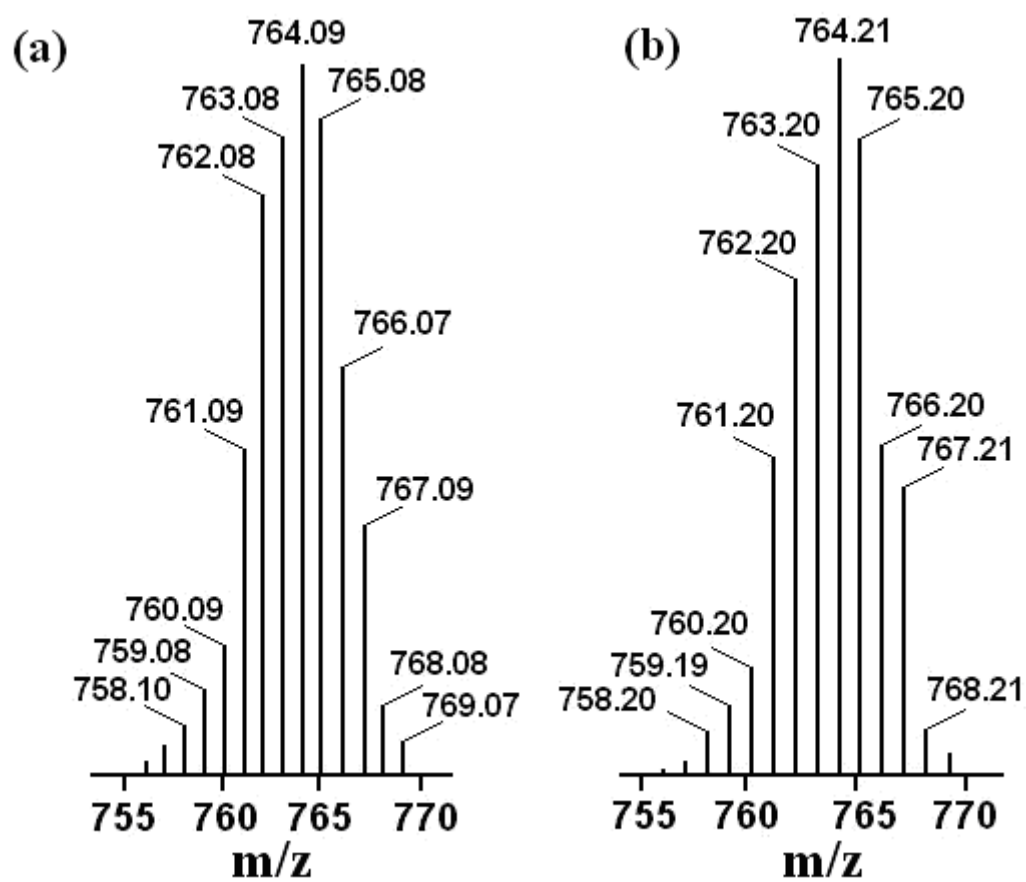

**Fig. S2.** IR spectra of (a) **1** and (b) **2** in KBr disk.

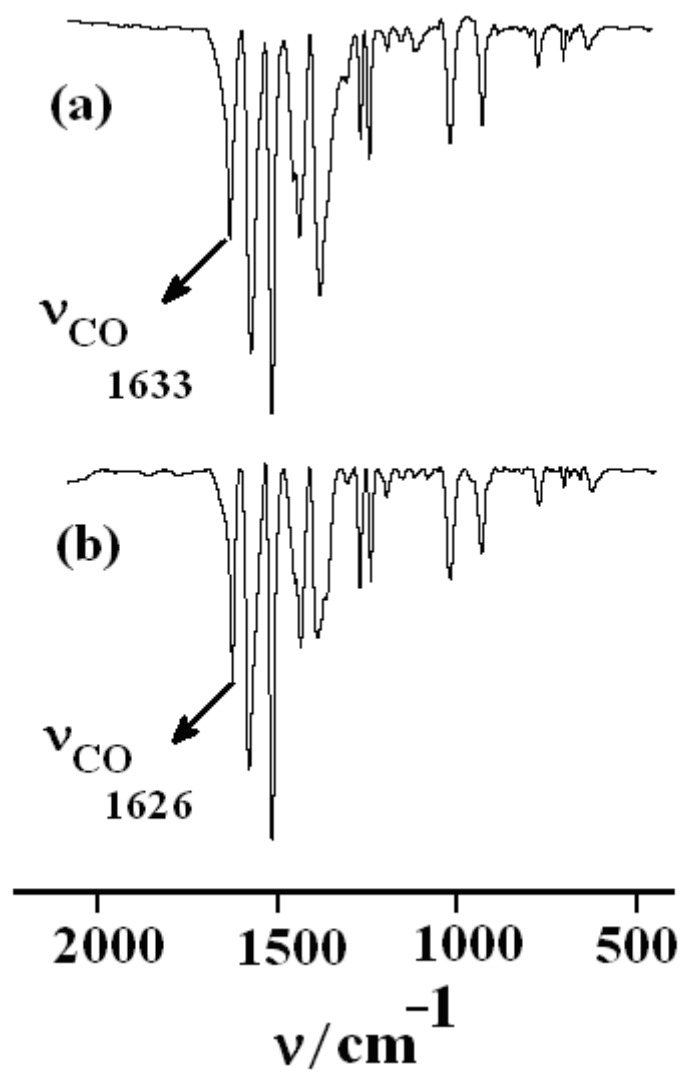

**Fig. S3.**  $^1\text{H}$  NMR spectra of (a) **1** and (b) **2** in  $\text{CDCl}_3$ .

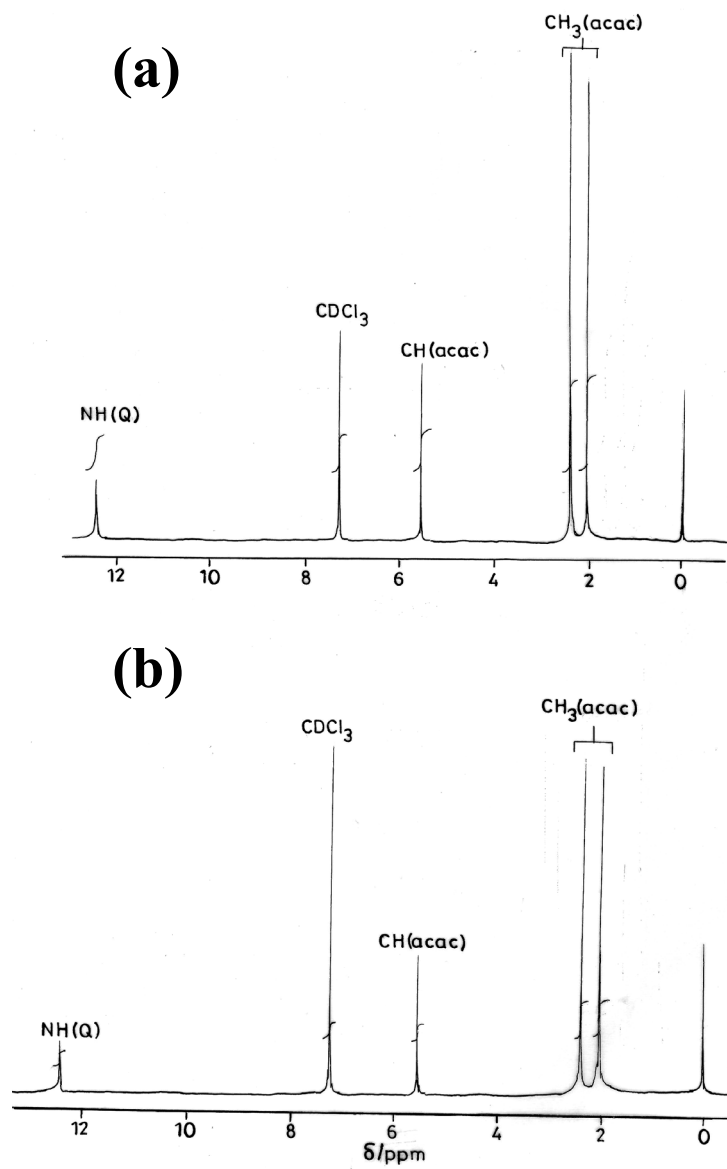

Supplement: b906900c.pdf [file b906900c.pdf]
